---

1 **Microbiota in milk from healthy and mastitis cows varies greatly in diversity, species**  
2 **richness and composition, as revealed by PacBio sequencing**

3

4 **Teng Ma, Lingling Shen, Qiannan Wen, Ruirui lv, Qiangchuan Hou, Lai Yu Kwok, Zhihong Sun,**  
5 **and Heping Zhang\***

6

7 Key Laboratory of Dairy Biotechnology and Engineering, Ministry of Education, Key Laboratory of  
8 Dairy Products Processing, Ministry of Agriculture, Inner Mongolia Agricultural University, Huhhot, P.  
9 R. China

10

11

12 **Correspondence**

13 Heping Zhang, College of Food Science and Engineering, Inner Mongolia Agricultural University,  
14 Huhhot, P. R. China.

15 E-mail: [hepingdd@vip.sina.com](mailto:hepingdd@vip.sina.com).

---

16 **Abstract**

17 Mastitis is the most economically important disease of dairy cows. This study used PacBio  
18 single-molecule real-time sequencing technology to sequence the full-length of the 16S rRNA from the  
19 microbiota in 27 milk samples (18 from mastitis and 9 from healthy cows; the cows were at different  
20 stages of lactation). We observed that healthy or late stage milk microbiota had significantly higher  
21 microbial diversity and richness. The community composition of the microbiota from different groups  
22 also varied greatly. In milk from healthy cows the microbiota was predominantly comprised of  
23 *Lactococcus lactis*, *Acinetobacter johnsonii* and *Bacteroides dorei*, while from mastitis cows it was  
24 predominantly comprised of *Bacillus cereus*, *Clostridium cadaveris* and *Streptococcus suis*. The  
25 prevalence of *La. lactis* and *B. cereus* in milk from healthy and mastitis cows was confirmed by digital  
26 droplets PCR. Differences in milk microbiota composition could suggest an important role for these  
27 microbes in protecting the host from mastitis. Based on the milk microbiota profiles, the Udder Health  
28 Index was constructed to predict the risk of bovine mastitis. Application of this predictive model could  
29 aid early identification and prevention of mastitis in dairy cows, though the model requires further  
30 optimisation using a larger dataset.

31

32 **KEYWORDS**

33 bovine mastitis, PacBio single-molecule real-time sequencing, 16S rRNA, digital droplets PCR, milk  
34 microbiota

35

---

36 **1 INTRODUCTION**

37 Bovine mastitis is an inflammatory reaction that occurs in the cow's mammary glands; it is caused either  
38 by invasion of pathogenic microbes or by physical/chemical stimulants (Rasmussen, Fogsgaard,  
39 Rontved, Klaas, & Herskin, 2011). In general, depending on the degree of inflammation, mastitis can be  
40 divided into subclinical and clinical mastitis. Clinical mastitis was diagnosed when the milk from the  
41 udder had visible abnormalities (e.g. the presence of floc and/or granules in milk or watery/reduced  
42 milk/no milk) or cows showing clinical symptoms, such as elevated body temperature, loss of  
43 appetite/refusal to eat, swelling/oedema of the affected quarter (Carolina Espeche et al., 2012; Metzger et  
44 al., 2018). In subclinical cases, animals are outwardly healthy, but when the somatic cell count (SCC) of  
45 milk samples is greater than 200,000 cells/mL and there is no evidence of clinical infection, they are  
46 classified as having subclinical mastitis (Pantoja, Hulland, & Ruegg, 2009). Bovine mastitis is one of the  
47 most common and serious diseases in the dairy farming industry; not only does it lead to a decline in  
48 milk production and milk quality, but it also increases the elimination and mortality rate of cows.  
49 Approximately 33% of the 231 million cows in the world have mastitis, and annual losses due to mastitis  
50 are as high as \$3.5 billion (Halasa, Huijps, Osteras, & Hogeveen, 2007). Owing to the huge economic  
51 significance of bovine mastitis, it is of major global concern.

52 The etiology of bovine mastitis is complicated and varies amongst countries and farms; it is  
53 influenced by environmental/geographical factors, feeding management methods, sanitary conditions,  
54 microbial infections, and attributes of individual cows (e.g. age, lactation stage, parity, body type,  
55 heredity). In general, the main cause of mastitis is bacterial infection (Haltia, Honkanen-Buzalski,  
56 Spiridonova, Olkonen, & Mylly, 2006), as supported by numerous reports of the isolation and

---

57 identification of mastitis-causing microbes using traditional microbiological methods. However,  
58 traditional bacterial culture is relatively slow and laborious and no pathogenic bacteria are detected, using  
59 conventional methods, in approximately 25% of milk samples collected from mastitis cows (Taponen,  
60 Salmikivi, Simojoki, Koskinen, & Pyorala, 2009). Second-generation sequencing technology only  
61 produces short sequence reads with low taxonomic resolution and has failed to identify mastitis-causing  
62 microbes (Dohoo et al., 2011; Liao, Lin, & Lin, 2015). Third-generation sequencing technology, such as  
63 the PacBio single-molecule real-time (SMRT) sequencing platform, is increasingly being used to  
64 characterize the microbiota of environmental samples (e.g. dairy products (Hui et al., 2017), milk (Hou et  
65 al., 2015) and food (Nakano et al., 2016) etc. In contrast to the older sequencing technologies, PacBio  
66 SMRT sequencing is high throughput and produces long reads capable of microbial identification to  
67 species level when used in conjunction with polymerase chain reaction (PCR) of full-length 16S rRNA  
68 genes (Mosher et al., 2014).

69 This study aimed to identify differences in the microbiota of milk from healthy and mastitis cows at  
70 different stages of lactation. Milk samples were collected from healthy and mastitis cows from the same  
71 dairy. Microbiota profiles in these samples were characterized at the species level by PacBio SMRT  
72 sequencing. Abundances of specific microbes were determined using ddPCR. With these data, an Udder  
73 Health Index was constructed using the Random Forest Algorithm. Our results serve as a useful reference  
74 for designing strategies to prevent and treat mastitis.

75

## 76 **2 MATERIALS AND METHODS**

### 77 **2.1 Experimental design and selection of cows**

---

78 This present study was conducted at Aoya Modern Ranch in Tai'an City (Shandong Province, China)  
79 using 2- to 6-year-old Holstein cows. The average age of calving is 23-76 months, and the milk  
80 production is about 3800 kg. From 26 dairy cows with severe clinical mastitis identified by professional  
81 veterinarians, 18 were randomly selected as mastitis group. For comparison, 9 milk samples obtained  
82 from healthy cows was used, and these cows had no history of mastitis and found to have a SCC lower  
83 than 15,000 cells/mL. Milk from the mastitis cows contained obvious floc or granules which prevented  
84 measurement of SCC. According to Vijayakumar et al (Vijayakumar et al., 2017). lactation in cows can  
85 be divided into early ( $1 \leq d \leq 100$ ), middle ( $101 \leq d \leq 200$ ), and late lactation ( $201 \leq d \leq$  dry milk  
86 period). Dairy cows are managed in accordance with the practices of the herd in the pasture, providing  
87 them with green fodder and calculating the amount of concentrated mixture. Furthermore, none of the  
88 cows had received antibiotics or any other medication known to influence the microbiota of their milk, in  
89 the three months before the study.

90

## 91 **2.2 Collection of milk samples**

92 Milk samples were collected from 27 cows in total (18 mastitis and 9 healthy cows; 8 early, 5 middle and  
93 14 late lactation stage cows); detailed information was shown in Table S1. Quarter milk samples were  
94 collected during the morning milking from all cows in the following way: Udders were thoroughly wiped  
95 using a clean dry cloth to remove bedding and visible contaminants; teats were sanitized; two or three  
96 streams of foremilk per teat were discarded; a 0.5% iodine solution was applied to the udder; after 60s  
97 the iodine was wiped off using another clean dry cloth towel; the collector then put on clean gloves; a  
98 further two to three streams of milk per teat were discarded; all teats were scrubbed with 70%

---

99 isopropanol; a further two streams of milk per teat were discarded after the isopropanol had dried;  
100 finally, approximately 10ml were collected into a sterile vial. All raw milk was stored and transported  
101 back to the laboratory on ice.

102

### 103 **2.3 Extraction of metagenomic DNA**

104 DNA was extracted from 3 ml of each raw milk sample using the PowerFood™ Microbial DNA  
105 Isolation Kit (MoBio Laboratories, Qiagen, USA) following the manufacturer's instructions. The quality  
106 of the extracted genomic DNA was examined by agarose gel electrophoresis and spectrophotometer  
107 analysis (ratio of optical density at 260 nm/280 nm). High quality DNA samples were temporarily stored  
108 in the refrigerator at -20°C prior use and for no longer than 6 hours.

109

### 110 **2.4 Droplet digital PCR**

111 To verify the sequencing results, ddPCR was used to quantify *La. lactis* and *B. cereus*, as they were the  
112 most abundant species in milk from healthy and mastitis cows, respectively. Nine samples from each  
113 group were included in this analysis. The ddPCR was done using the QX200 system (Bio-Rad, Hercules,  
114 CA, USA). Primer 5.0 software was used to design the primers targeting *La. lactis* (lactisF,  
115 5'-AGCAGTAGGGAATCTTCGGCA-3'; lactisR, 5'-GGGTAGTTACCGTCACTTGATGAG-3') and *B.*  
116 *cereus* (PCERF, 5'-GGATTCATGGAGCGGCAGTA-3'; PCERR3,  
117 5'-GCTTACCTGTCATGGTGTA ACTTCA-3') based on the species-specific genomic region (Francisco  
118 Martinez-Blanch, Sanchez, Garay, & Aznar, 2011; Ma et al., 2018). The ddPCR reaction solution was  
119 prepared by mixing 2 µl DNA, 0.2 µl each of the upstream and downstream primers, 10 µl 2-fold

---

120 EvaGreen ddPCRSuperMix and 7.6  $\mu$ l of sterilized ultra-pure water. The prepared ddPCR reaction  
121 solution and the droplet generation oil were added to the droplet generation card and partitioned into  
122 20,000 droplets per sample by the QX200 droplet generator (Cremonesi et al., 2016). The droplets  
123 produced by each sample were transferred to a 96-well plate and PCR amplification carried out using the  
124 EvaGreen program: 95°C for 10 min, 40-cycles of 94°C for 30 sec, 60°C for *La. lactis* and 62°C for *B.*  
125 *cereus* for 1 min, and 4°C for 5 min, followed by 90°C for 5 min and a hold at 4°C. After thermal  
126 cycling, the 96-well plate was loaded into the QX200 droplet reader. Data were collected using  
127 QuantaSoft software, and the number of target DNA molecules calculated based on Poisson statistics.

128

## 129 **2.5 Amplification of full-length 16S rRNA genes and SMRT sequencing**

130 The 16S rRNA genes were amplified by PCR using the purified extracted genomic DNA as templates,  
131 with the universal primer pair 27F (5'-AGAGTTTGATCCTGGCTCAG-3') and 1495R  
132 (5'-CTACGGCTACCTTGTACGA-3') (Mosher, Bemberg, Shevchenko, Kan, & Kaplan, 2013). At the  
133 same time, to identify different samples in the same library, a 16-base identification barcode was added  
134 to both ends of all primers. The specific amplification conditions were as follows: 95°C for 3 min, 98°C  
135 for 20 s, 60°C for 15 s, 72°C for 30 s, 30 cycles and then 72°C for 2 min.

136 PCR products from each sample were purified and equal mass-mixed to construct the DNA library  
137 for sequencing by the Agilent DNA 1000 Kit, according to the manufacturer's instructions. The  
138 constructed library, sequencing primers and DNA polymerase, were added to the SMRT cells for  
139 sequencing using the PacBio RS II instrument.

140

---

141 **2.6 Bioinformatics processing of high-quality sequences**

142 Quality control of raw data was achieved using the RS\_ReadsOfinsert.1 protocol available in the SMRT  
143 Portal version 2.3. Specific quality control conditions were based on the following criteria: minimum  
144 cycle sequencing number, minimum prediction accuracy, minimum insertion sequence length and  
145 maximum insertion sequence length, which were set to 5, 90, 1,400 and 1,800 respectively (Hou et al.,  
146 2015). Then all sequences were divided into different samples according to the barcodes on the  
147 amplicons. After removal of barcodes and primer sequences, bioinformatics analysis of high-quality  
148 sequences was done using the QIIME package (version 1.7), briefly, PyNAST (Caporaso et al., 2010)  
149 was used to align the sequences, and UCLUST (Edgar, 2010) was done under 100% clustering of  
150 sequence identity to obtain representative sequences. Afterwards, sequences were classified into  
151 operational taxonomic units (OTU) according to 97% similarity. Chimeric OTU sequences were detected  
152 and removed using ChimeraSlayer (Haas et al., 2011). The Ribosomal Database Project (RDP, Release  
153 11.5) (Cole et al., 2007), Greengenes (version 13.8) (DeSantis et al., 2006) and Silva (version  
154 128) (Quast et al., 2013) databases were used to assign the taxonomy of each OTU representative  
155 sequence with an 80% confidence threshold (Hou et al., 2015). A *de novo* taxonomic tree was  
156 constructed for representative OTU sets using FastTree for downstream analysis (Price, Dehal, & Arkin,  
157 2009). The alpha diversity of each sample was assessed based on the sample with the lowest sequencing  
158 depth. All sequencing data generated have been uploaded to the MG-RAST database under the project  
159 number mgp88495 (<http://www.mg-rast.org>).

160

161 **2.7 Random Forest algorithm for predicting cow udder health**



---

162 Here a mastitis prediction model was built to predict the udder health status of dairy cows based on the  
163 default settings of the Random Forest machine learning algorithm available in R package (3.1.1) (Cutler,  
164 Edwards, Beard, Cutler, & Hess, 2007). Briefly, the prediction was based on regression of the milk  
165 microbiota profiles of all 27 cows against their mastitis health status. The Random Forest algorithm  
166 ranked all species into ‘character importance’ and used the ‘rfcv’ function to generate more than 100  
167 predictions to determine the number of top discriminant species required for calculating the Udder Health  
168 Index. Then the Udder Health Index was calculated based on the relative abundance of the predicted top  
169 discriminatory milk microbes.

170

## 171 **2.8 Statistical analyses**

172 The R software package was used for statistical analysis (<http://www.rproject.org/>). Wilcoxon and  
173 Kruskal-Wallis tests were used to evaluate differences in microbial between groups with a cut-off  
174 confidence level of 95%. Principal coordinate analysis (PCoA) was used to observe the distribution of  
175 samples. Permutational multivariate analysis of variance (PERMANOVA) (Anderson & Walsh, 2013)  
176 was done on the different groups of samples in the R language ‘vegan’ (Nilsson et al., 2010) package to  
177 reveal the effect of different groups on the target microbiota of healthy and mastitis cows. The ‘ggplot2’  
178 package (Ginestet, 2011) was used to analyze and visualize the raw results obtained by QIIME.  
179 Cytoscape 3.5.1 was used for network building.

180

## 181 **3 RESULTS**

### 182 **3.1 Sequence coverage and alpha diversity of microbiota from milk**

---

183 A total of 169,308 high-quality 16S rRNA sequences were produced from the 27 samples included in this  
184 study (average = 6,270; range = 1,010-15,174; SD = 3,905). After PyNAST alignment and UCLUST  
185 classification at 100% similarity, 82,592 representative sequences remained. Upon removal of chimeric  
186 sequences, they were classed into 6,850 OTUs for downstream analysis.

187 All Shannon diversity curves leveled off, suggesting that the sequencing depth was sufficient to  
188 capture representative microbial populations present in the samples (Figure S1), although new  
189 phlotypes may still be found with further sequencing. The microbial abundance and species richness in  
190 each sample were assessed by the number of observed OTUs and the Shannon diversity index,  
191 respectively. Both the number of observed OTUs and Shannon diversity index were significantly higher  
192 in healthy compared with mastitis cows (Figure 1a, b;  $P < 0.001$ ). We also found that both indices were  
193 significantly higher during late compared with early lactation, while no significant difference was  
194 observed amongst other lactation stages (Figure 1c, d;  $P < 0.05$ ).

195

### 196 **3.2 Identity of microbiota in milk**

197 *Firmicutes* (73.0%) and *Bacteroidetes* (10.9%) were the two main bacterial phyla. At the genus level,  
198 there were 12 genera with an average relative abundance of more than 1% (Figure 2a), including *Bacillus*  
199 (28.5%), *Clostridium* (10.6%), *Lactobacillus* (10.4%), *Lactococcus* (7.9%) and *Bacteroides* (6.1%). At  
200 the species level, 15 of which had an average relative abundance of over 1% (Figure 2c), including *B.*  
201 *cereus* (27.6%), *La. lactis* (7.8%), *Lactobacillus helveticus* (6.3%), *Clostridium limosum* (4.4%),  
202 *Helcococcus ovis* (3.4%), and *Clostridium cadaveris* (3.2%) et al.

---

203 The mean microbiota composition varied largely between groups. Whereas the horizontal lines in the  
204 box-plots indicate the median, we found that more *Lactobacillus*, *Lactococcus*, *Bacteroides* and  
205 *Acinetobacter* were detected in healthy cows, while more *Bacillus*, *Clostridium* and *Streptococcus* were  
206 observed in mastitis cows (Figure 2b). Significantly more *La. lactis* was found in the milk of healthy  
207 cows, while *B. cereus* was found in the mastitis cows ( $P < 0.05$ , Figure 2d). The relative abundance of  
208 *Bacillus* and *Clostridium* were not significantly different in milk collected during the early and middle  
209 compared with late lactation. In addition, significantly more *La. lactis*, *S. suis*, *A. johnsonii*, and *B. dorei*  
210 were detected in milk from late compared with early and middle lactation cows ( $P < 0.05$ ). The relative  
211 abundance of *H. ovis* and *P. heparinolytica* gradually decreased as lactation day increased (Figure S2).

212

### 213 **3.3 Comparative analysis of community structure in milk from cows**

214 A PCoA was done based on the Bray Curtis distance to visualize differences in the milk microbiota  
215 between the healthy and mastitis groups. Two distinct clusters formed on the PCoA score plot,  
216 representing milk samples collected from healthy and mastitis cows, respectively (Figure 3a). This  
217 suggests large difference in the microbiota community structure and composition between the two groups.  
218 Results of the PERMANOVA test revealed that mastitis was a significant factor contributing to  
219 differences in microbiota between the two groups ( $P = 0.001$ ).

220 When samples were grouped based on the three lactation stages, the distinction between groups were  
221 less clear. Clusters associated with early and middle lactation milk overlapped each other and were  
222 separate from the cluster representing late lactation milk. This indicates that the former two groups were  
223 more similar to each other than they were to the latter group (Figure 3b). The PERMANOVA test

---

224 revealed significant difference in the milk microbiota composition of the three lactation stages ( $P =$   
225 0.016). However, the effect size of lactation stage on milk microbiota was smaller than that of mastitis  
226 status. It is worth noting that most late lactation dairy cows were healthy.

227 Wilcoxon and Kruskal-Wallis tests were done to identify differentially abundant taxa in the different  
228 groups. Species that were significantly differentially abundant (average relative abundance  $> 0.5\%$ ) are  
229 listed in Table S2 and S3. Significantly more *La. lactis*, *A. johnsonii* and *B. dorei* were found in the milk  
230 of healthy ( $P < 0.01$ ) compared with mastitis cows, while significantly more *B. cereus* and *S. suis* were  
231 found in the milk of mastitis compared with healthy cows ( $P < 0.05$ ). Meanwhile, significantly more *La.*  
232 *lactis*, *A. johnsonii*, *B. dorei*, *S. stercoricanis* and *S. suis* were present in the milk of late lactation cows  
233 compared with other lactation stages ( $P < 0.05$ ); the two latter species were found only during late  
234 lactation.

235

### 236 **3.4 Correlation analysis of microbiota community structure in milk from cows**

237 Spearman correlation analyses were done to identify co-occurrence relationships amongst the major  
238 bacterial genera (an average relative abundance  $> 0.5\%$ ) in milk from healthy and mastitis cows. The  
239 results are expressed as correlation network diagrams. The milk microbiota of the healthy group seemed  
240 to be closely interrelated, contrasting with the overall weak networking apparent amongst bacterial  
241 genera in milk from mastitis cows. In milk from healthy cows, *Lactococcus* was significantly and  
242 negatively correlated with *Acinetobacter* ( $r = -0.78$ ;  $p = 0.01$ ) and *Massilia* ( $r = -0.70$ ;  $p = 0.04$ , Figure  
243 3c), respectively. It is interesting to note that the *Faecalibacterium* formed the highest number of

---

244 significant correlations with other genera from milk. In contrast, *Faecalibacterium* didn't correlate with  
245 any genera in the milk from mastitis cows (Figure 3d).

246

### 247 **3.5 Quantification of microbial in cows milk by ddPCR and construction of Udder Health Index**

248 To verify the sequencing results, ddPCR was done to quantify the number of *La. lactis* and *B. cereus*, as  
249 they were the most abundant species in the healthy and mastitis groups, respectively. For the healthy  
250 group, there were significantly more *La. lactis* ( $2.16 \times 10^3$  copies/ml) compared with *B. cereus* ( $P < 0.01$ ),  
251 and *B. cereus* was only detected in the sample C17 (healthy group). An opposite trend was observed for  
252 the mastitis group, with a significantly higher abundance of *B. cereus* ( $3.25 \times 10^4$  copies/ml) compared  
253 with *La. lactis* ( $9.00 \times 10^2$  copies/mL;  $P < 0.001$ ) (Figure 4a). These results were consistent with those  
254 found by DNA sequencing.

255 The Random Forest regression model was applied to predict the udder health of cows. The relative  
256 abundances of bacterial species detected in milk were regressed against each cow's health status. The top  
257 nine mastitis-discriminatory marker species were selected based on the minimum 'CV error', and an  
258 Udder Health Index was constructed (Figure 4b,d). Udder Health Indices for the healthy and mastitis  
259 groups were calculated; a higher value represented a healthier status. As expected, the Udder Health  
260 Index was significantly higher for the healthy compared with the mastitis group ( $P < 0.001$ , Figure 4c).  
261 To verify the accuracy of the constructed model, the SCC of the healthy milk samples was measured  
262 (Table 1). But this was not possible for the mastitis group due to the milk flocs were obvious and the  
263 granules were large, accompanied by blood and different degree of coagulation. However, the SCC  
264 associated well with the predicted Udder Health Index of the healthy cows, validating the current model.

---

265

266 **4 DISCUSSION**

267 Mastitis is a common disease among dairy cows; symptoms include shortening of lactation period and  
268 milk production, increase in leukocytes in the milk, and lesions in mammary tissues (Paster, Dewhirst,  
269 Olsen, & Fraser, 1994). Since bovine mastitis results in huge economical losses, its prevention and  
270 treatment have attracted wide attention. Bovine mastitis can also increase the microbial load in milk  
271 resulting in rapid changes in the quality and shelf life of raw milk and related products (Murphy, Martin,  
272 Barbano, & Wiedmann, 2016). Pathogenic bacteria in raw milk from mastitis cows are a serious food  
273 safety issue as they may lead to human disease. In addition, clinical mastitis is a serious animal welfare  
274 concern because mastitis is debilitating and painful (Fromm & Boor, 2004; Halasa et al., 2007). Milk is  
275 produced by the mammary tissues of lactating cows; the appearance, texture, and quantity of secreted  
276 cow milk are indicative of the health of the mammary tissue and thus serve as indicators for clinical  
277 mastitis. This study used PacBio SMRT sequencing technology to reveal the community composition of  
278 microbiota in milk from dairy cows, and identified differences in the milk microbiota of healthy and  
279 mastitis cows, and cows at different stages of lactation. We observed a significantly higher microbial  
280 diversity and richness in milk from healthy compared with mastitis cows, as reported in other  
281 studies (Braem et al., 2012; Kuehn et al., 2013). Our data also showed that the microbial diversity and  
282 richness of milk also increased significantly during late lactation. On the other hand, the increase in  
283 microbial diversity could indicate a healthy state of the cows, as the mastitis milk might be dominated by  
284 certain pathogens, which would be reflected by the diminished microbiota diversity. Moreover, changes  
285 in milk microbiota at different lactation stages could be associated with changes in the nutritional content

---

286 of the milk, e.g. the total concentration of milk oligosaccharides was found to decrease in the early and  
287 mid lactation stages. The anionic oligosaccharides including N-glycolylneuraminic acid decreased more  
288 rapidly than the neutral oligosaccharides in lactation (Nakamura et al., 2003; Tao, DePeters, German,  
289 Grimm, & Lebrilla, 2009). Therefore, when cows suffer from mastitis, the mammary tissues may be  
290 overwhelmed with harmful bacteria; this could induce localized immune responses that suppress the  
291 healthy resident microbiota and reduce microbial diversity and richness in the mammary gland (Kuang et  
292 al., 2009).

293 We found that the distribution of bacterial taxa present in milk also varied greatly between healthy  
294 and mastitis cows, as found in other studies (Falentin et al., 2016; Oikonomou, Machado, Santisteban,  
295 Schukken, & Bicalho, 2012). The predominant genera detected in this work included *Lactobacillus*,  
296 *Streptococcus*, *Acinetobacter* and *Bacillus*, which are known to be common in milk (N. Li et al., 2018).  
297 We found significantly more *Lactobacillus*, *Lactococcus* and *Acinetobacter* in milk from healthy  
298 compared with mastitis cows. The relative abundance of *Lactobacillus* in milk is known to be negatively  
299 associated with milk SCC, an indicator of the seriousness of mastitis; thus, these bacteria are crucial in  
300 maintaining the health of the mammary tissues and suppressing local infection and inflammation (Yu,  
301 Ren, Xi, Huang, & Zhang, 2017). In contrast, *Lactococcus* is known to be able to cause bovine  
302 mastitis (Rodrigues, Lima, Higgins, Canniatti-Brazaca, & Bicalho, 2016). *Acinetobacter* is widely  
303 distributed in nature and is often detected in milk, soil and water. It is also considered as an opportunistic  
304 pathogen associated with wounds and skin infections (Dortet, Legrand, Soussy, & Cattoir, 2006; L. Li et  
305 al., 2016). Results of the Spearman correlation analysis in our study indicated a negative correlation  
306 between *Lactococcus* and *Acinetobacter*, suggesting that there may be a competition inhibition

---

307 relationship between them. *Bacteroides* are typical milk bacteria that may also have a role in maintaining  
308 healthy mammary tissues (Quigley et al., 2013). Differences in the correlation patterns between the milk  
309 microbiota from healthy and mastitis cows may suggest an important role of milk microbiota in  
310 protecting cows from mastitis. Our data revealed an increase in the relative abundances of *Bacillus*,  
311 *Clostridium* and *Streptococcus* in milk from mastitis compared with healthy cows. *Staphylococcus* has  
312 been reported as the most common cause of mastitis in cows worldwide, followed by  
313 *Streptococcus* (Moroni et al., 2006). *Clostridium* species have been reported to cause abscesses in  
314 mammary tissues of sows and humans as well as gangrene in cows (Durojaiye, Gaur, & Alsaffar, 2011;  
315 Osman, El-Enbaawy, Ezzeldeen, & Hussein, 2009). The *Bacillus* genus includes some important  
316 causative agents of mastitis, e.g. *B. cereus* (Parkinson, Merrall, & Fenwick, 1999); in this study *B. cereus*  
317 increased in relative abundance (up to 27.55%) in milk from mastitis compared with healthy cows. By  
318 ddPCR, we confirmed the elevated abundance of *Bacillus cereus* in the mastitis group ( $3.25 \times 10^4$   
319 copies/mL); it was practically absent in the healthy group. These results suggest a possible link between  
320 *B. cereus* and bovine mastitis.

321 Another spectrum of mastitis-associated bacterial sequences detected in this study was the anaerobes,  
322 including *F. necrophorum* and *B. dorei*. Although these bacteria are unlikely to be causative agents of  
323 clinical bovine mastitis, they are known to be associated with summer mastitis and may interact with  
324 other pathogens such as *Trueperella pyogenes* (Oikonomou et al., 2012; Pyoral, Jousimies-Somer, &  
325 Mero, 1992). Significantly more *P. heparinolytica* and *H. ovis* sequences were detected in milk from  
326 cows at the early lactation stage in this study, both *P. heparinolytica* and *H. ovis* are potential pathogens  
327 that have previously been isolated from mammary gland wounds causing localized infection (Paster et



---

328 al., 1994). It is suspected that the presence of *H. ovis* in cows milk indicates involvement in the  
329 pathogenesis of mastitis (Schwaiger et al., 2012). The relative abundances of *La. lactis*, *A. johnsonii* and  
330 *B. dorei* were higher during late lactation compared with the early and middle lactation stages. *B. dorei*  
331 can suppress the production of lipopolysaccharides by intestinal gut microbes and thus reduces  
332 pro-inflammatory immune responses (Yoshida et al., 2018). Furthermore, changes in susceptibility to  
333 mastitis might be coupled with changes in community composition of the milk microbiota, such as  
334 increases in *B. dorei* and *La. lactis* (Xu et al., 2017).

335 Cows suffering from subclinical mastitis can easily develop clinical mastitis if they are not spotted  
336 early enough and managed appropriately. Therefore, it is important to predict the likely risk of mastitis  
337 developing. Current practice defines subclinical mastitis using a cut-off SCC threshold level of 200 000  
338 cells/mL. However, the determination of milk SCC is widely used to monitor udder health, but there are  
339 still some limitations: (1) it may take a longer time for the SCC to return to that of a healthy state after  
340 pathogen clearance, so there is a window period when the diagnosis based on SCC level would not be  
341 accurate; (2) the SCC value fluctuates largely with individual milk yield and other environmental factors;  
342 (3) diagnosis based purely on SCC is mainly applicable to mastitis cows caused by contagious pathogens,  
343 while mastitis caused by environmental factors would be hard to detect due to the relatively small  
344 changes in SCC (Pyorala et al., 1992; Sharma, Singh, & Bhadwal, 2011). In this study we used the  
345 Random Forest model identified the 9 top marker species that were indicative of bovine mastitis, and  
346 constructed an Udder Health Index based on the relative abundances of these species. We validated the  
347 model by associating the index with the SCC of healthy cows. Our results showed that the accuracy of the  
348 model was 88.89%. Thus, this index would be a good complementary indicator that helps detect early

---

349 changes in cow health. One limitation of the current model is the small sample size, therefore, larger  
350 scale future works will be necessary to optimize and verify this model.

351

## 352 **5 CONCLUSION**

353 The results of this study showed great variation in the microbiota in milk from healthy and mastitis cows.  
354 Overall there was a high relative abundance of commensals in healthy milk and a high relative abundance  
355 of potential pathogens in milk from mastitis cows. Finally, the Udder Health Index constructed is helpful  
356 for early identification of mastitis risk and has the potential to be used to prevent mastitis from developing,  
357 and prompt measures should be taken to prevent further development of clinical mastitis.

358

## 359 **ACKNOWLEDGEMENTS**

360 This research was supported by the China Agriculture Research System (Grant CARS-36) of the Inner  
361 Mongolia Science & Technology Projects. The authors wish to sincerely thank Mr. Yang Ku for allowing  
362 the collection of milk samples from the cows on his farm. We also thank Dr. Lai Yu-Kwok for their  
363 valuable revision of the English text.

364

---

365 **REFERENCES**

- 366 Anderson, M. J., & Walsh, D. C. I. (2013). PERMANOVA, ANOSIM, and the Mantel test in the face of  
367 heterogeneous dispersions: what null hypothesis are you testing? *Ecological Monographs*, *83*,  
368 557-574. <https://doi.org/10.1890/12-2010.1>
- 369 Braem, G., De Vliegher, S., Verbist, B., Heyndrickx, M., Leroy, F., & De Vuyst, L. (2012).  
370 Culture-independent exploration of the teat apex microbiota of dairy cows reveals a wide  
371 bacterial species diversity. *Veterinary Microbiology*, *157*, 383-390.  
372 <https://doi.org/10.1016/j.vetmic.2011.12.031>
- 373 Caporaso, J. G., Kuczynski, J., Stombaugh, J., Bittinger, K., Bushman, F. D., Costello, E. K., . . . Knight, R.  
374 (2010). QIIME allows analysis of high-throughput community sequencing data. *Nature Methods*,  
375 *7*, 335-336. <https://doi.org/10.1038/nmeth.f.303>
- 376 Carolina Espeche, M., Pellegrino, M., Frola, I., Larriestra, A., Bogni, C., & Fatima Nader-Macias, M. E.  
377 (2012). Lactic acid bacteria from raw milk as potentially beneficial strains to prevent bovine  
378 mastitis. *Anaerobe*, *18*, 103-109. <https://doi.org/10.1016/j.anaerobe.2012.01.002>
- 379 Cole, J. R., Chai, B., Farris, R. J., Wang, Q., Kulam-Syed-Mohideen, A. S., McGarrell, D. M., . . . Tiedje,  
380 J. M. (2007). The ribosomal database project (RDP-II): introducing myRDP space and quality  
381 controlled public data. *Nucleic Acids Research*, *35*, D169-D172.  
382 <https://doi.org/10.1093/nar/gkl889>
- 383 Cremonesi, P., Cortimiglia, C., Picozzi, C., Minozzi, G., Malvisi, M., Luini, M., & Castiglioni, B. (2016).  
384 Development of a droplet digital polymerase chain reaction for rapid and simultaneous  
385 identification of common food borne pathogens in soft cheese. *Frontiers in Microbiology*, *7*,  
386 1725. <https://doi.org/10.3389/fmicb.2016.01725>
- 387 Cutler, D. R., Edwards, T. C., Jr., Beard, K. H., Cutler, A., & Hess, K. T. (2007). Random forests for  
388 classification in ecology. *Ecology*, *88*, 2783-2792. <https://doi.org/10.1890/07-0539.1>
- 389 DeSantis, T. Z., Hugenholtz, P., Larsen, N., Rojas, M., Brodie, E. L., Keller, K., . . . Andersen, G. L.  
390 (2006). Greengenes, a chimera-checked 16S rRNA gene database and workbench compatible  
391 with ARB. *Applied and Environmental Microbiology*, *72*, 5069-5072.  
392 <https://doi.org/10.1128/aem.03006-05>
- 393 Dohoo, I. R., Smith, J., Andersen, S., Kelton, D. F., Godden, S., & Mastitis Res Workers, C. (2011).  
394 Diagnosing intramammary infections: evaluation of definitions based on a single milk sample.  
395 *Journal of Dairy Science*, *94*, 250-261. <https://doi.org/10.3168/jds.2010-3559>
- 396 Dortet, L., Legrand, P., Soussy, C.-J., & Cattoir, V. (2006). Bacterial identification, clinical significance,  
397 and antimicrobial susceptibilities of *Acinetobacter ursingii* and *Acinetobacter schindleri*, two  
398 frequently misidentified opportunistic pathogens. *Journal of Clinical Microbiology*, *44*,  
399 4471-4478. <https://doi.org/10.1128/jcm.01535-06>
- 400 Durojaiye, O., Gaur, S., & Alsaffar, L. (2011). Bacteraemia and breast abscess: unusual extra-intestinal  
401 manifestations of *Clostridium difficile* infection. *Journal of Medical Microbiology*, *60*, 378-380.  
402 <https://doi.org/10.1099/jmm.0.027409-0>
- 403 Edgar, R. C. (2010). Search and clustering orders of magnitude faster than BLAST. *Bioinformatics*, *26*,  
404 2460-2461. <https://doi.org/10.1093/bioinformatics/btq461>
- 405 Falentin, H., Rault, L., Nicolas, A., Bouchard, D. S., Lassalas, J., Lamberton, P., . . . Even, S. (2016).  
406 Bovine teat microbiome analysis revealed reduced alpha diversity and significant changes in

- 
- 407 taxonomic profiles in quarters with a history of mastitis. *Frontiers in Microbiology*, 7, 480.  
408 <https://doi.org/10.3389/fmicb.2016.00480>
- 409 Francisco Martinez-Blanch, J., Sanchez, G., Garay, E., & Aznar, R. (2011). Detection and quantification of  
410 viable *Bacillus cereus* in food by RT-qPCR. *European Food Research and Technology*, 232,  
411 951-955. <https://doi.org/10.1007/s00217-011-1465-1>
- 412 Fromm, H. I., & Boor, K. J. (2004). Characterization of pasteurized fluid milk shelf-life attributes. *Journal*  
413 *of Food Science*, 69, M207-M214. <https://doi.org/10.1111/j.1365-2621.2004.tb09889.x>
- 414 Ginestet, C. (2011). ggplot2: elegant graphics for data analysis. *Journal of the Royal Statistical Society*  
415 *Series a-Statistics in Society*, 174, 245-245. [https://doi.org/10.1111/j.1467-985X.2010.00676\\_9.x](https://doi.org/10.1111/j.1467-985X.2010.00676_9.x)
- 416 Haas, B. J., Gevers, D., Earl, A. M., Feldgarden, M., Ward, D. V., Giannoukos, G., . . . Human  
417 Microbiome, C. (2011). Chimeric 16S rRNA sequence formation and detection in Sanger and  
418 454-pyrosequenced PCR amplicons. *Genome Research*, 21, 494-504.  
419 <https://doi.org/10.1101/gr.112730.110>
- 420 Halasa, T., Huijps, K., Osteras, O., & Hogeveen, H. (2007). Economic effects of bovine mastitis and  
421 mastitis management: a review. *Veterinary Quarterly*, 29, 18-31.  
422 <https://doi.org/10.1080/01652176.2007.9695224>
- 423 Haltia, L., Honkanen-Buzalski, T., Spiridonova, I., Olkonen, A., & Myllys, V. (2006). A study of bovine  
424 mastitis, milking procedures and management practices on 25 Estonian dairy herds. *Acta*  
425 *Veterinaria Scandinavica*, 48, 22. <https://doi.org/10.1186/1751-0147-48-22>
- 426 Hou, Q., Xu, H., Zheng, Y., Xi, X., Kwok, L.-Y., Sun, Z., . . . Zhang, W. (2015). Evaluation of bacterial  
427 contamination in raw milk, ultra-high temperature milk and infant formula using single molecule,  
428 real-time sequencing technology. *Journal of Dairy Science*, 98, 8464-8472.  
429 <https://doi.org/10.3168/jds.2015-9886>
- 430 Hui, W., Hou, Q., Cao, C., Xu, H., Zhen, Y., Kwok, L.-Y., . . . Zhang, W. (2017). Identification of  
431 microbial profile of Koji using single molecule, real-time sequencing technology. *Journal of*  
432 *Food Science*, 82, 1193-1199. <https://doi.org/10.1111/1750-3841.13699>
- 433 Kuang, Y., Tani, K., Synnott, A. J., Ohshima, K., Higuchi, H., Nagahata, H., & Tanji, Y. (2009).  
434 Characterization of bacterial population of raw milk from bovine mastitis by culture-independent  
435 PCR-DGGE method. *Biochemical Engineering Journal*, 45, 76-81.  
436 <https://doi.org/10.1016/j.bej.2009.02.010>
- 437 Kuehn, J. S., Gorden, P. J., Munro, D., Rong, R., Dong, Q., Plummer, P. J., . . . Phillips, G. J. (2013).  
438 Bacterial community profiling of milk samples as a means to understand culture-negative bovine  
439 clinical mastitis. *PloS One*, 8, e61959. <https://doi.org/10.1371/journal.pone.0061959>
- 440 Li, L., Renye, J. A., Jr., Feng, L., Zeng, Q., Tang, Y., Huang, L., . . . Yang, P. (2016). Characterization of  
441 the indigenous microflora in raw and pasteurized buffalo milk during storage at refrigeration  
442 temperature by high-throughput sequencing. *Journal of Dairy Science*, 99, 7016-7024.  
443 <https://doi.org/10.3168/jds.2016-11041>
- 444 Li, N., Wang, Y., You, C., Ren, J., Chen, W., Zheng, H., & Liu, Z. (2018). Variation in raw milk  
445 microbiota throughout 12 months and the impact of weather conditions. *Scientific Reports*, 8,  
446 1-10. <https://doi.org/10.1038/s41598-018-20862-8>
- 447 Liao, Y.-C., Lin, S.-H., & Lin, H.-H. (2015). Completing bacterial genome assemblies: strategy and  
448 performance comparisons. *Scientific Reports*, 5, 8747. <https://doi.org/10.1038/srep08747>

- 
- 449 Ma, C., Sun, Z., Zeng, B., Huang, S., Zhao, J., Zhang, Y., . . . Zhang, H. (2018). Cow-to-mouse fecal  
450 transplantations suggest intestinal microbiome as one cause of mastitis. *Microbiome*, *6*, 200.  
451 <https://doi.org/10.1186/s40168-018-0578-1>
- 452 Metzger, S. A., Hernandez, L. L., Skarlupka, J. H., Walker, T. M., Suen, G., & Ruegg, P. L. (2018). A  
453 cohort study of the milk microbiota of healthy and inflamed bovine mammary glands from dryoff  
454 through 150 days in milk. *Frontiers in Veterinary Science*, *5*, 247.  
455 <https://doi.org/10.3389/fvets.2018.00247>
- 456 Moroni, P., Rossi, C. S., Pisoni, G., Bronzo, V., Castiglioni, B., & Boettcher, P. J. (2006). Relationships  
457 between somatic cell count and intramammary infection in buffaloes. *Journal of Dairy Science*,  
458 *89*, 998-1003. [https://doi.org/10.3168/jds.S0022-0302\(06\)72165-8](https://doi.org/10.3168/jds.S0022-0302(06)72165-8)
- 459 Mosher, J. J., Bernberg, E. L., Shevchenko, O., Kan, J., & Kaplan, L. A. (2013). Efficacy of a 3rd  
460 generation high-throughput sequencing platform for analyses of 16S rRNA genes from  
461 environmental samples. *Journal of Microbiological Methods*, *95*, 175-181.  
462 <https://doi.org/10.1016/j.mimet.2013.08.009>
- 463 Mosher, J. J., Bowman, B., Bernberg, E. L., Shevchenko, O., Kan, J., Korlach, J., & Kaplan, L. A. (2014).  
464 Improved performance of the PacBio SMRT technology for 16S rDNA sequencing. *Journal of*  
465 *Microbiological Methods*, *104*, 59-60. <https://doi.org/10.1016/j.mimet.2014.06.012>
- 466 Murphy, S. C., Martin, N. H., Barbano, D. M., & Wiedmann, M. (2016). Influence of raw milk quality on  
467 processed dairy products: how do raw milk quality test results relate to product quality and yield?  
468 *Journal of Dairy Science*, *99*, 10128-10149. <https://doi.org/10.3168/jds.2016-11172>
- 469 Nakamura, T., Kawase, H., Kimura, K., Watanabe, Y., Ohtani, M., Arai, I., & Urashima, T. (2003).  
470 Concentrations of sialyloligosaccharides in bovine colostrum and milk during the prepartum and  
471 early lactation. *Journal of Dairy Science*, *86*, 1315-1320.  
472 [https://doi.org/10.3168/jds.S0022-0302\(03\)73715-1](https://doi.org/10.3168/jds.S0022-0302(03)73715-1)
- 473 Nakano, K., Shiroma, A., Tamotsu, H., Ohki, S., Shimoji, M., Ashimine, N., . . . Hirano, T. (2016). First  
474 complete genome sequence of the skin-improving *Lactobacillus curvatus* Strain FBA2, isolated  
475 from fermented vegetables, determined by PacBio single-molecule real-time technology. *Genome*  
476 *announcements*, *4*, e00884-e008816. <https://doi.org/10.1128/genomeA.00884-16>
- 477 Nilsson, R. H., Veldre, V., Hartmann, M., Unterseher, M., Amend, A., Bergsten, J., . . . Abarenkov, K.  
478 (2010). An open source software package for automated extraction of ITS1 and ITS2 from fungal  
479 ITS sequences for use in high-throughput community assays and molecular ecology. *Fungal*  
480 *Ecology*, *3*, 284-287. <https://doi.org/10.1016/j.funeco.2010.05.002>
- 481 Oikonomou, G., Machado, V. S., Santisteban, C., Schukken, Y. H., & Bicalho, R. C. (2012). Microbial  
482 diversity of bovine mastitis milk as described by pyrosequencing of metagenomic 16s rDNA.  
483 *PloS One*, *7*, e47671. <https://doi.org/10.1371/journal.pone.0047671>
- 484 Osman, K. M., El-Enbaawy, M. I., Ezzeldeen, N. A., & Hussein, H. M. G. (2009). Mastitis in dairy buffalo  
485 and cattle in Egypt due to *Clostridium perfringens*: prevalence, incidence, risk factors and costs.  
486 *Revue Scientifique Et Technique-Office International Des Epizooties*, *28*, 975-986.  
487 <https://doi.org/10.20506/rst.28.3.1936>
- 488 Pantoja, J. C. F., Hulland, C., & Ruegg, P. L. (2009). Somatic cell count status across the dry period as a  
489 risk factor for the development of clinical mastitis in the subsequent lactation. *Journal of Dairy*  
490 *Science*, *92*, 139-148. <https://doi.org/10.3168/jds.2008-1477>

- 
- 491 Parkinson, T. J., Merrall, M., & Fenwick, S. G. (1999). A case of bovine mastitis caused by *Bacillus*  
492 *cereus*. *New Zealand Veterinary Journal*, *47*, 151-152.  
493 <https://doi.org/10.1080/00480169.1999.36134>
- 494 Paster, B. J., Dewhirst, F. E., Olsen, I., & Fraser, G. J. (1994). Phylogeny of *Bacteroides*, *Prevotella*, and  
495 *Porphyromonas* spp. and related bacteria. *Journal of Bacteriology*, *176*, 725-732.  
496 <https://doi.org/10.1128/jb.176.3.725-732.1994>
- 497 Price, M. N., Dehal, P. S., & Arkin, A. P. (2009). FastTree: computing large minimum evolution trees with  
498 profiles instead of a distance matrix. *Molecular Biology and Evolution*, *26*, 1641-1650.  
499 <https://doi.org/10.1093/molbev/msp077>
- 500 Pyorala, S., Jousimies-Somer, H., & Mero, M. (1992). Clinical, bacteriological and therapeutic aspects of  
501 bovine mastitis caused by aerobic and anaerobic pathogens. *The British veterinary journal*, *148*,  
502 54-62.
- 503 Quast, C., Pruesse, E., Yilmaz, P., Gerken, J., Schweer, T., Yarza, P., . . . Gloeckner, F. O. (2013). The  
504 SILVA ribosomal RNA gene database project: improved data processing and web-based tools.  
505 *Nucleic Acids Research*, *41*, D590-D596. <https://doi.org/10.1093/nar/gks1219>
- 506 Quigley, L., O'Sullivan, O., Stanton, C., Beresford, T. P., Ross, R. P., Fitzgerald, G. F., & Cotter, P. D.  
507 (2013). The complex microbiota of raw milk. *FEMS Microbiology Reviews*, *37*, 664-698.  
508 <https://doi.org/10.1111/1574-6976.12030>
- 509 Rasmussen, D. B., Fogsgaard, K., Rontved, C. M., Klaas, I. C., & Herskin, M. S. (2011). Changes in  
510 thermal nociceptive responses in dairy cows following experimentally induced *Escherichia coli*  
511 mastitis. *Acta Veterinaria Scandinavica*, *53*, 32. <https://doi.org/10.1186/1751-0147-53-32>
- 512 Rodrigues, M. X., Lima, S. F., Higgins, C. H., Canniatti-Brazaca, S. G., & Bicalho, R. C. (2016). The  
513 *Lactococcus* genus as a potential emerging mastitis pathogen group: a report on an outbreak  
514 investigation. *Journal of Dairy Science*, *99*, 9864-9874. <https://doi.org/10.3168/jds.2016-11143>
- 515 Schwaiger, K., Wimmer, M., Huber-Schlenstedt, R., Fehlings, K., Hoelzel, C. S., & Bauer, J. (2012). Hot  
516 topic: bovine milk samples yielding negative or nonspecific results in bacterial culturing-The  
517 possible role of PCR-single strand conformation polymorphism in mastitis diagnosis. *Journal of*  
518 *Dairy Science*, *95*, 98-101. <https://doi.org/10.3168/jds.2011-4700>
- 519 Sharma, N., Singh, N. K., & Bhadwal, M. S. (2011). Relationship of somatic cell count and mastitis: an  
520 overview. *Asian-Australasian Journal of Animal Sciences*, *24*, 429-438.  
521 <https://doi.org/10.5713/ajas.2011.10233>
- 522 Tao, N., DePeters, E. J., German, J. B., Grimm, R., & Lebrilla, C. B. (2009). Variations in bovine milk  
523 oligosaccharides during early and middle lactation stages analyzed by high-performance liquid  
524 chromatography-chip/mass spectrometry. *Journal of Dairy Science*, *92*, 2991-3001.  
525 <https://doi.org/10.3168/jds.2008-1642>
- 526 Taponen, S., Salmikivi, L., Simojoki, H., Koskinen, M. T., & Pyorala, S. (2009). Real-time polymerase  
527 chain reaction-based identification of bacteria in milk samples from bovine clinical mastitis with  
528 no growth in conventional culturing. *Journal of Dairy Science*, *92*, 2610-2617.  
529 <https://doi.org/10.3168/jds.2008-1729>
- 530 Vijayakumar, M., Park, J. H., Ki, K. S., Lim, D. H., Kim, S. B., Park, S. M., . . . Kim, T. I. (2017). The  
531 effect of lactation number, stage, length, and milking frequency on milk yield in Korean Holstein  
532 dairy cows using automatic milking system. *Asian-Australasian Journal of Animal Sciences*, *30*,  
533 1093-1098. <https://doi.org/10.5713/ajas.16.0882>

- 
- 534 Xu, H., Huang, W., Hou, Q., Kwok, L.-y., Sun, Z., Ma, H., . . . Zhang, H. (2017). The effects of probiotics  
535 administration on the milk production, milk components and fecal bacteria microbiota of dairy  
536 cows. *Science Bulletin*, 62, 767-774. <https://doi.org/10.1016/j.scib.2017.04.019>
- 537 Yoshida, N., Emoto, T., Yamashita, T., Watanabe, H., Hayashi, T., Tabata, T., . . . Hirata, K.-i. (2018).  
538 *Bacteroides vulgatus* and *Bacteroides dorei* reduce gut microbial lipopolysaccharide production  
539 and inhibit atherosclerosis. *Circulation*, 138, 2486-2498.  
540 <https://doi.org/10.1161/circulationaha.118.033714>
- 541 Yu, J., Ren, Y., Xi, X., Huang, W., & Zhang, H. (2017). A novel Lactobacilli-based teat disinfectant for  
542 improving bacterial communities in the milks of cow teats with subclinical mastitis. *Frontiers in*  
543 *Microbiology*, 8, 1782. <https://doi.org/10.3389/fmicb.2017.01782>

---

544 **TABLES**

545 **Table 1** Udder Health Index, somatic cell count (SCC), and total bacterial count of cow milk samples

---

| Cow milk sample | Udder Health Index | SCC ( $\times 10^4$ cells/mL) | Total bacteria count ( $\times 10^4$ |
|-----------------|--------------------|-------------------------------|--------------------------------------|
|                 |                    |                               | CFU/mL)                              |
| C2              | 0.142              | 12.2                          | 0.863                                |
| C4              | 0.253              | 14.8                          | 0.948                                |
| C14             | 0.846              | 13.8                          | 0.882                                |
| C13             | 0.849              | 13.3                          | 1.050                                |
| C18             | 1.334              | 12.9                          | 0.819                                |
| C17             | 2.180              | 12.0                          | 0.796                                |
| C15             | 4.062              | 11.1                          | 0.859                                |
| C20             | 5.545              | 10.7                          | 0.671                                |
| C12             | 9.753              | 9.9                           | 0.698                                |

---

546



---

547 **FIGURE LEGENDS**

548 **Figure 1** Comparison of the number of observed OTUs and Shannon diversity index for the microbiota  
549 in milk. The healthy and mastitis cows (a, b); early, middle and late lactation (c, d). Healthy and mastitis  
550 cows are represented by 'HC' and 'MC', respectively. Early, middle, and late lactation stages are  
551 represented by 'EL', 'ML' and 'LL', respectively. Single and triple asterisks represent  $P < 0.05$  and  $P <$   
552  $0.001$ , respectively.

553

554 **Figure 2** Community composition of the bacterial microbiota in milk from healthy and mastitis cows.  
555 Milk bacterial community at the genus (a and b) and species (c and d) levels. Healthy and mastitis cows  
556 are represented by 'HC' and 'MC', respectively.

557

558 **Figure 3** Principal coordinates analysis (PCoA) and correlation networks of the bacterial microbiota in  
559 milk from healthy and mastitis cows. They are grouped based on mastitis status (a) and lactation stage  
560 (b). The co-occurrence relationship was calculated using Spearman's rank correlation analysis of the  
561 microbiota in milk from healthy (c) and mastitis (d) cows. Only major genera of average relative  
562 abundance  $> 0.5\%$  are included in the analysis. The diameter of the circles represents the abundance of  
563 the genera. Healthy and mastitis cows are represented by 'HC' and 'MC', respectively. Early, middle, and  
564 late lactation stages are represented by 'EL', 'ML' and 'LL', respectively.

565

566 **Figure 4** Quantification of *La. lactis* and *B. cereus* in cows' milk by ddPCR and construction of Udder  
567 Health Index. (a) The prevalence of *La. lactis* and *B. cereus* in milk from healthy and mastitis cows. (b)

---

568 Model marker species selected based on minimum CV error. (c) The nine selected marker species of the  
569 model. (d) Udder Health Indices in the healthy and mastitis groups. Healthy and mastitis cows are  
570 represented by 'HC' and 'MC', respectively. Single and triple asterisks represent  $P < 0.05$  and  $P < 0.001$ ,  
571 respectively.

572

573

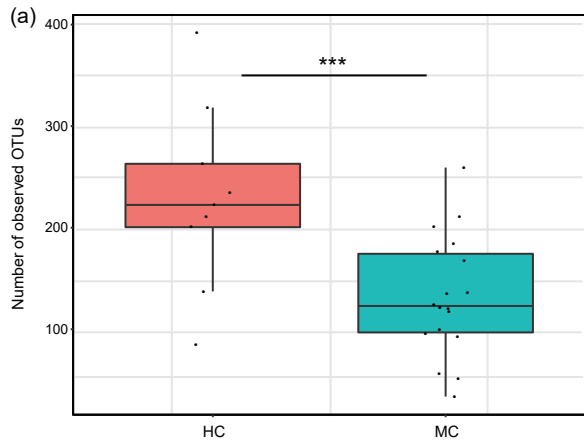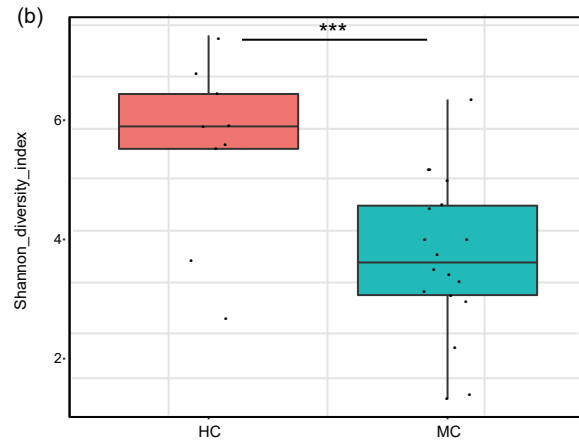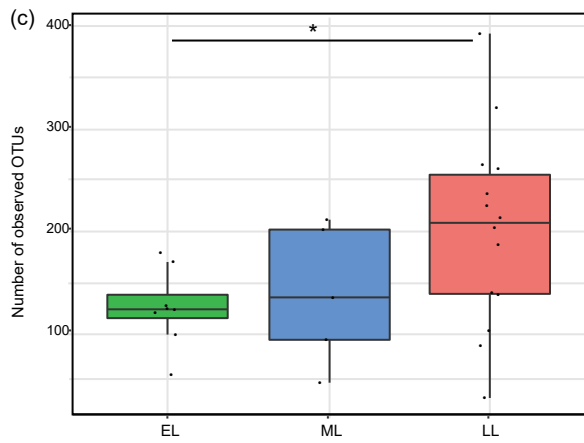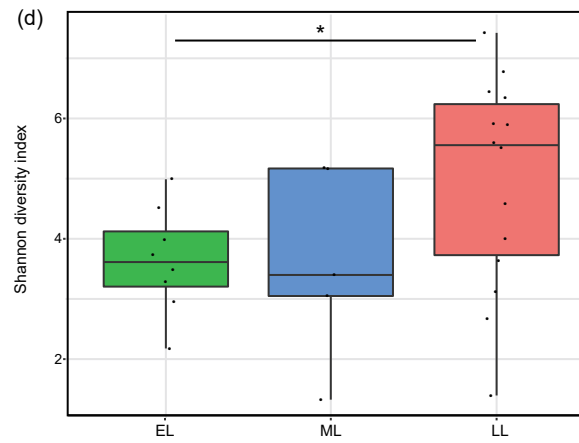

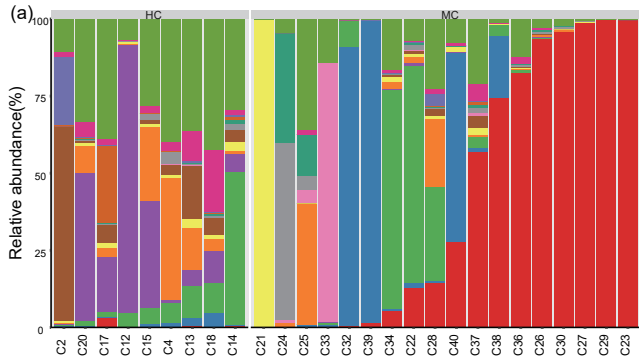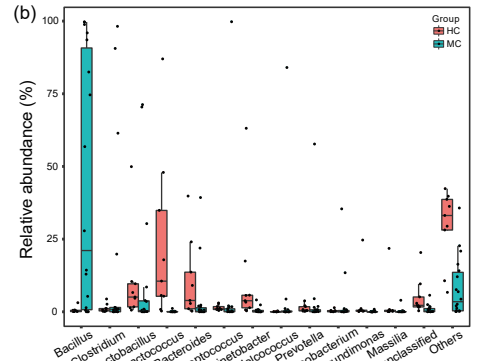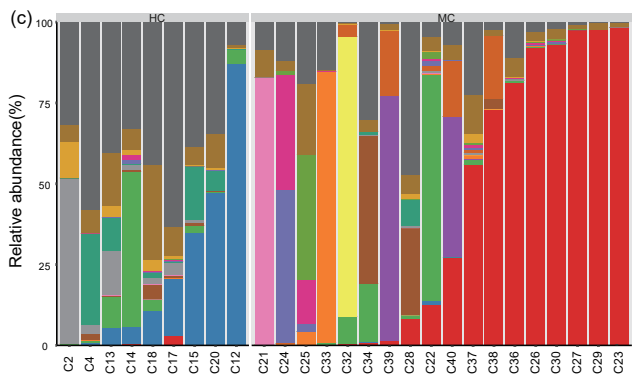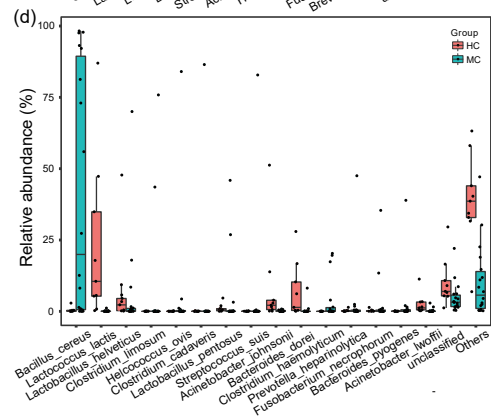

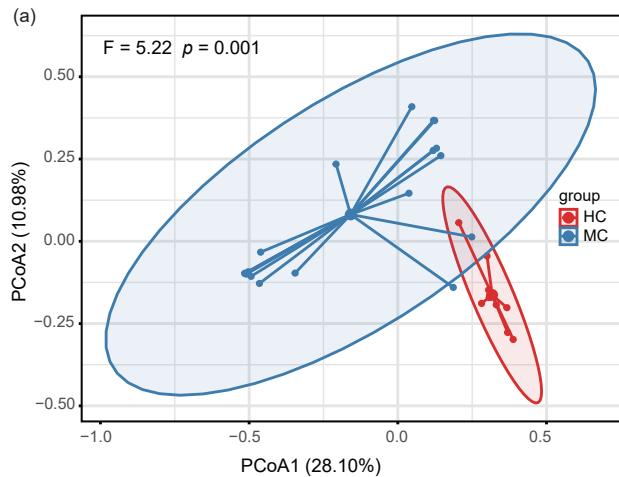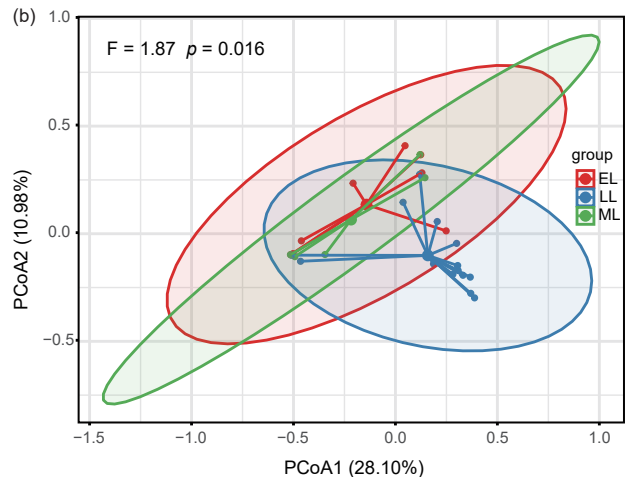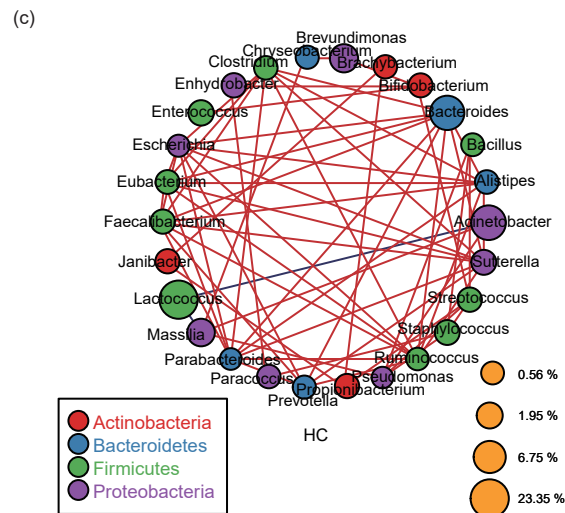

Correlation network

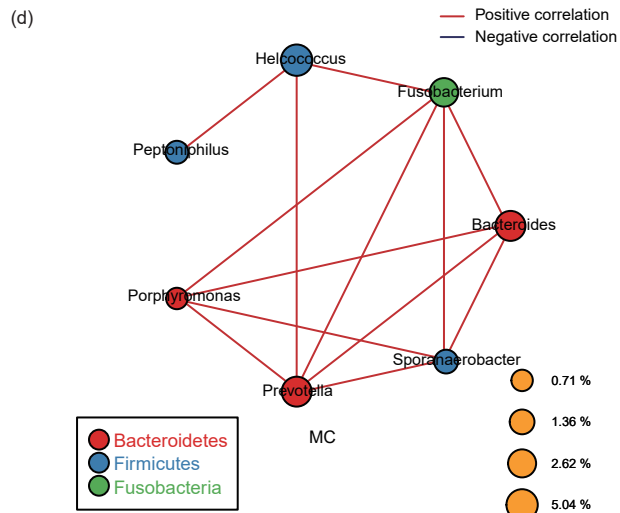

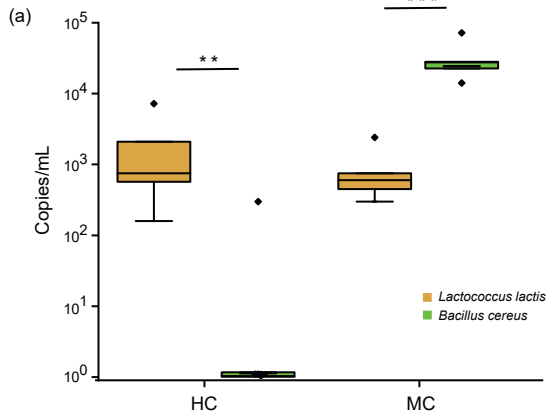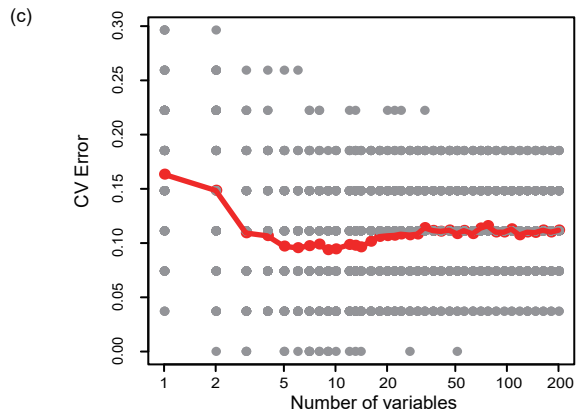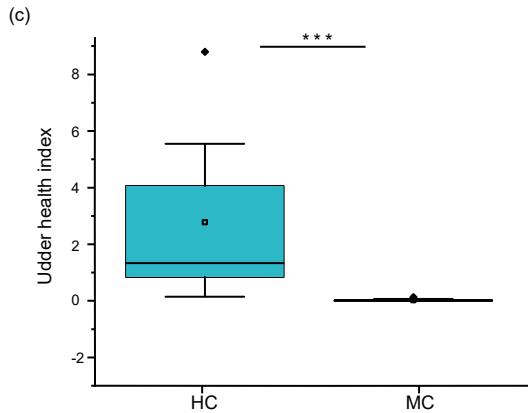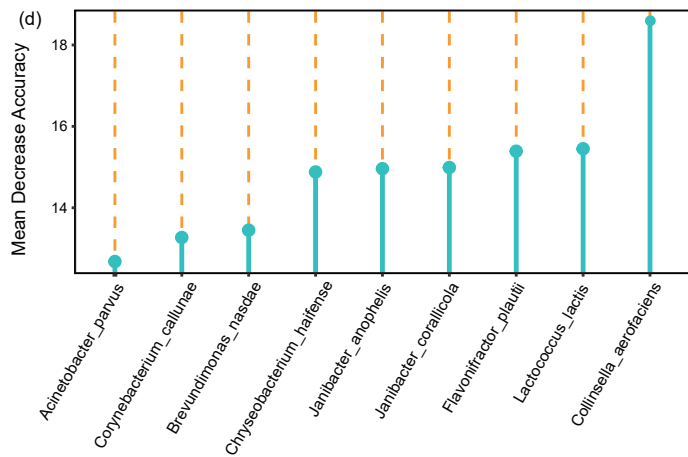

Source: http://biorxiv.org/content/10.1101/2020.08.13.249524v1.full.pdf
